# Supplementary material for: Clinical effectiveness of oral antiviral treatment for non-hospitalized high-risk patients with COVID-19 during Omicron JN.1 subvariant wave: a US-based propensity-matched cohort study
Source: Springer Nature journal article supplement (doi:10.1186/s41479-025-00168-w), 2025-05-24
Supplement: MOESM1 [file 41479_2025_168_MOESM1_ESM.pdf]

**Supplemental Table 1. Demographic, diagnostic, procedural, medication, visit, and laboratory codes utilized in the definition of the cohorts.**

| Category                                                                     | Code                | Description                                                                                                       |
|------------------------------------------------------------------------------|---------------------|-------------------------------------------------------------------------------------------------------------------|
| <b>#1 Age at least 18 years</b>                                              |                     |                                                                                                                   |
| demographics                                                                 | Age                 | Age (at least 18 years)                                                                                           |
| <b>#2 Visited HCOs at least 3 times between Feb 1, 2024 and Apr 30, 2024</b> |                     |                                                                                                                   |
| (must have any of the following between Feb 1, 2024 and Apr 30, 2024)        |                     |                                                                                                                   |
| visit                                                                        | TNX:Visit           | Number of occurrences: greater than or equal to 3 instances                                                       |
| <b>#3 Diagnosed with COVID-19 between Feb 1, 2024 and Apr 30, 2024</b>       |                     |                                                                                                                   |
| (must have any of the following between Feb 1, 2024 and Apr 30, 2024)        |                     |                                                                                                                   |
| laboratory                                                                   | TNX:9088            | SARS coronavirus 2 and related RNA [Presence] (labResult: Positive)                                               |
| diagnosis                                                                    | UMLS:ICD10CM:U07.1  | COVID-19                                                                                                          |
| diagnosis                                                                    | UMLS:ICD10CM:U07.2  | COVID-19, virus not identified (WHO)                                                                              |
| diagnosis                                                                    | UMLS:ICD10CM:J12.81 | Pneumonia due to SARS-associated coronavirus                                                                      |
| diagnosis                                                                    | UMLS:ICD10CM:J12.82 | Pneumonia due to coronavirus disease 2019                                                                         |
| diagnosis                                                                    | UMLS:ICD10CM:B34.2  | Coronavirus infection, unspecified                                                                                |
| diagnosis                                                                    | UMLS:ICD10CM:B97.2  | Coronavirus as the cause of diseases classified elsewhere                                                         |
| diagnosis                                                                    | UMLS:ICD10CM:B97.21 | SARS-associated coronavirus as the cause of diseases classified elsewhere                                         |
| diagnosis                                                                    | UMLS:ICD10CM:B97.29 | Other coronavirus as the cause of diseases classified elsewhere                                                   |
| laboratory                                                                   | UMLS:LNC:94309-2    | SARS-CoV-2 (COVID-19) RNA [Presence] in Specimen by NAA with probe detection (labResult: Positive)                |
| laboratory                                                                   | UMLS:LNC:94500-6    | SARS-CoV-2 (COVID-19) RNA [Presence] in Respiratory specimen by NAA with probe detection (labResult: Positive)    |
| laboratory                                                                   | UMLS:LNC:94502-2    | SARS-related coronavirus RNA [Presence] in Respiratory specimen by NAA with probe detection (labResult: Positive) |
| laboratory                                                                   | UMLS:LNC:94558-4    | SARS-CoV-2 (COVID-19) Ag [Presence] in Respiratory specimen by Rapid immunoassay (labResult: Positive)            |
| laboratory                                                                   | UMLS:LNC:94565-9    | SARS-CoV-2 (COVID-19) RNA [Presence] in Nasopharynx by NAA with non-probe detection (labResult: Positive)         |
| laboratory                                                                   | UMLS:LNC:94759-8    | SARS-CoV-2 (COVID-19) RNA [Presence] in Nasopharynx by NAA with probe detection (labResult: Positive)             |
| laboratory                                                                   | UMLS:LNC:94845-5    | SARS-CoV-2 (COVID-19) RNA [Presence] in Saliva (oral fluid) by NAA with probe detection (labResult: Positive)     |
| laboratory                                                                   | UMLS:LNC:95406-5    | SARS-CoV-2 (COVID-19) RNA [Presence] in Nose by NAA with probe detection (labResult: Positive)                    |

|            |                  |                                                                                                                    |
|------------|------------------|--------------------------------------------------------------------------------------------------------------------|
| laboratory | UMLS:LNC:95608-6 | SARS-CoV-2 (COVID-19) RNA [Presence] in Respiratory specimen by NAA with non-probe detection (labResult: Positive) |
| laboratory | UMLS:LNC:96119-3 | SARS-CoV-2 (COVID-19) Ag [Presence] in Upper respiratory specimen by Immunoassay (labResult: Positive)             |

#### #4 High risk comorbid conditions for COVID-19 progression

(must have any of the following comorbid condition occurred within 1 year and 1 month before the diagnosis using #3)

|           |                      |                                                                                  |
|-----------|----------------------|----------------------------------------------------------------------------------|
| diagnosis | UMLS:ICD10CM:D49-D49 | Neoplasms of unspecified behavior (D49)                                          |
| diagnosis | UMLS:ICD10CM:D37-D48 | Neoplasms of uncertain behavior, polycythemia vera and myelodysplastic syndromes |
| diagnosis | UMLS:ICD10CM:C7A-C7A | Malignant neuroendocrine tumors (C7A)                                            |
| diagnosis | UMLS:ICD10CM:C81-C96 | Malignant neoplasms of lymphoid, hematopoietic and related tissue                |
| diagnosis | UMLS:ICD10CM:C7B-C7B | Secondary neuroendocrine tumors (C7B)                                            |
| diagnosis | UMLS:ICD10CM:C76-C80 | Malignant neoplasms of ill-defined, other secondary and unspecified sites        |
| diagnosis | UMLS:ICD10CM:C73-C75 | Malignant neoplasms of thyroid and other endocrine glands                        |
| diagnosis | UMLS:ICD10CM:C69-C72 | Malignant neoplasms of eye, brain and other parts of central nervous system      |
| diagnosis | UMLS:ICD10CM:C64-C68 | Malignant neoplasms of urinary tract                                             |
| diagnosis | UMLS:ICD10CM:C60-C63 | Malignant neoplasms of male genital organs                                       |
| diagnosis | UMLS:ICD10CM:C51-C58 | Malignant neoplasms of female genital organs                                     |
| diagnosis | UMLS:ICD10CM:C50-C50 | Malignant neoplasms of breast (C50)                                              |
| diagnosis | UMLS:ICD10CM:C45-C49 | Malignant neoplasms of mesothelial and soft tissue                               |
| diagnosis | UMLS:ICD10CM:C43-C44 | Melanoma and other malignant neoplasms of skin                                   |
| diagnosis | UMLS:ICD10CM:C40-C41 | Malignant neoplasms of bone and articular cartilage                              |
| diagnosis | UMLS:ICD10CM:C30-C39 | Malignant neoplasms of respiratory and intrathoracic organs                      |
| diagnosis | UMLS:ICD10CM:C15-C26 | Malignant neoplasms of digestive organs                                          |
| diagnosis | UMLS:ICD10CM:C00-C14 | Malignant neoplasms of lip, oral cavity and pharynx                              |
| diagnosis | UMLS:ICD10CM:D80-D89 | Certain disorders involving the immune mechanism                                 |
| diagnosis | UMLS:ICD10CM:N18     | Chronic kidney disease (CKD)                                                     |
| diagnosis | UMLS:ICD10CM:K72.9   | Hepatic failure, unspecified                                                     |
| diagnosis | UMLS:ICD10CM:K72.1   | Chronic hepatic failure                                                          |
| diagnosis | UMLS:ICD10CM:K71.9   | Toxic liver disease, unspecified                                                 |
| diagnosis | UMLS:ICD10CM:K71.8   | Toxic liver disease with other disorders of liver                                |
| diagnosis | UMLS:ICD10CM:K71.6   | Toxic liver disease with hepatitis, not elsewhere classified                     |
| diagnosis | UMLS:ICD10CM:K71.5   | Toxic liver disease with chronic active hepatitis                                |
| diagnosis | UMLS:ICD10CM:K71.4   | Toxic liver disease with chronic lobular hepatitis                               |
| diagnosis | UMLS:ICD10CM:K71.3   | Toxic liver disease with chronic persistent hepatitis                            |
| diagnosis | UMLS:ICD10CM:K71.1   | Toxic liver disease with hepatic necrosis                                        |
| diagnosis | UMLS:ICD10CM:K71.0   | Toxic liver disease with cholestasis                                             |
| diagnosis | UMLS:ICD10CM:K77     | Liver disorders in diseases classified elsewhere                                 |

|           |                      |                                                                                |
|-----------|----------------------|--------------------------------------------------------------------------------|
| diagnosis | UMLS:ICD10CM:K75     | Other inflammatory liver diseases                                              |
| diagnosis | UMLS:ICD10CM:K74     | Fibrosis and cirrhosis of liver                                                |
| diagnosis | UMLS:ICD10CM:I20-I25 | Ischemic heart diseases                                                        |
| diagnosis | UMLS:ICD10CM:I50     | Heart failure                                                                  |
| diagnosis | UMLS:ICD10CM:K73     | Chronic hepatitis, not elsewhere classified                                    |
| diagnosis | UMLS:ICD10CM:I60-I69 | Cerebrovascular diseases                                                       |
| diagnosis | UMLS:ICD10CM:E11     | Type 2 diabetes mellitus                                                       |
| diagnosis | UMLS:ICD10CM:E65-E68 | Overweight, obesity and other hyperalimentation                                |
| diagnosis | UMLS:ICD10CM:K70     | Alcoholic liver disease                                                        |
| diagnosis | UMLS:ICD10CM:K71.7   | Toxic liver disease with fibrosis and cirrhosis of liver                       |
| diagnosis | UMLS:ICD10CM:F01-F99 | Mental, Behavioral and Neurodevelopmental disorders                            |
| diagnosis | UMLS:ICD10CM:G30     | Alzheimer's disease                                                            |
| diagnosis | UMLS:ICD10CM:F10-F19 | Mental and behavioral disorders due to psychoactive substance use              |
| diagnosis | UMLS:ICD10CM:F20-F29 | Schizophrenia, schizotypal, delusional, and other non-mood psychotic disorders |
| diagnosis | UMLS:ICD10CM:F30-F39 | Mood [affective] disorders                                                     |
| diagnosis | UMLS:ICD10CM:J40-J4A | Chronic lower respiratory diseases                                             |
| diagnosis | UMLS:ICD10CM:I10-I1A | Hypertensive diseases                                                          |

#### **#5 Not hospitalized 2 days before to 5 days after the diagnosis**

(cannot have any of the following 2 days before to 5 days after the diagnosis using #3)

|       |                              |                            |
|-------|------------------------------|----------------------------|
| visit | UMLS:HL7V3.0:VisitType:ACUTE | Visit: Inpatient Acute     |
| visit | UMLS:HL7V3.0:VisitType:IMP   | Visit: Inpatient Encounter |
| visit | UMLS:HL7V3.0:VisitType:NONAC | Visit: Inpatient Non-acute |
| visit | UMLS:HL7V3.0:VisitType:SS    | Visit: Short Stay          |

#### **#5 Not deceased on the day of diagnosis**

(cannot have the following on the day of diagnosis using #3)

|              |          |          |
|--------------|----------|----------|
| demographics | Deceased | Deceased |
|--------------|----------|----------|

#### **#6 Use of anti-COVID-19 agents**

( Study group: must have any of #6.1 or #6.2 and must not have #6.3 within 5 days of diagnosis; control group: must not have any of #6.1-3)

##### **#6.1 NMV-r (must have both the following)**

|            |                    |              |
|------------|--------------------|--------------|
| medication | NLM:RXNORM:2587892 | Nirmatrelvir |
| medication | NLM:RXNORM:85762   | Ritonavir    |

##### **#6.2 Molnupiravir (must have the following)**

|            |                    |              |
|------------|--------------------|--------------|
| medication | NLM:RXNORM:2587901 | Molnupiravir |
|------------|--------------------|--------------|

##### **#6.3 Other anti-COVID-19 agents**

|            |                    |              |
|------------|--------------------|--------------|
| medication | NLM:RXNORM:2284718 | Remdesivir   |
| medication | NLM:RXNORM:2587300 | Tixagevimab  |
| medication | NLM:RXNORM:2587306 | Cilgavimab   |
| medication | NLM:RXNORM:2592360 | Bebtelovimab |

|           |                       |                                                                                                                                 |
|-----------|-----------------------|---------------------------------------------------------------------------------------------------------------------------------|
| procedure | UMLS:ICD10PCS:XW14325 | Transfusion of Convalescent Plasma<br>(Nonautologous) into Central Vein,<br>Percutaneous Approach, New Technology<br>Group 5    |
| procedure | UMLS:ICD10PCS:XW13325 | Transfusion of Convalescent Plasma<br>(Nonautologous) into Peripheral Vein,<br>Percutaneous Approach, New Technology<br>Group 5 |

---

**Supplemental Table 2.** Demographic, diagnostic, and laboratory codes utilized in the definition of covariates.

| <b>Codes</b> | <b>Description</b>                                                                        |
|--------------|-------------------------------------------------------------------------------------------|
| AI           | Age at Index                                                                              |
| F            | Female                                                                                    |
| 56370        | Black or African American                                                                 |
| M            | Male                                                                                      |
| 75301        | White                                                                                     |
| 1002-5       | American Indian or Alaska Native                                                          |
| UNK          | Unknown Race                                                                              |
| 64498        | Native Hawaiian or Other Pacific Islander                                                 |
| UN           | Unknown Ethnicity                                                                         |
| 104582       | Not Hispanic or Latino                                                                    |
| 85865        | Hispanic or Latino                                                                        |
| 84373        | Other Race                                                                                |
| 46997        | Asian                                                                                     |
| C00-D49      | Neoplasms                                                                                 |
| F20-F29      | Schizophrenia, schizotypal, delusional, and other non-mood psychotic disorders            |
| F30-F39      | Mood [affective] disorders                                                                |
| F40-F48      | Anxiety, dissociative, stress-related, somatoform and other nonpsychotic mental disorders |
| F50-F59      | Behavioral syndromes associated with physiological disturbances and physical factors      |
| F70-F79      | Intellectual Disabilities                                                                 |
| F17          | Nicotine dependence                                                                       |
| Z87.891      | Personal history of nicotine dependence                                                   |
| D80-D89      | Certain disorders involving the immune mechanism                                          |
| Z21          | Asymptomatic human immunodeficiency virus [HIV] infection status                          |
| B20          | Human immunodeficiency virus [HIV] disease                                                |
| N18          | Chronic kidney disease (CKD)                                                              |
| J40-J4A      | Chronic lower respiratory diseases                                                        |
| E84          | Cystic fibrosis                                                                           |
| K70-K77      | Diseases of liver                                                                         |
| E66          | Overweight and obesity                                                                    |
| E08-E13      | Diabetes mellitus                                                                         |
| I10-I1A      | Hypertensive diseases                                                                     |
| I20-I25      | Ischemic heart diseases                                                                   |
| I26-I28      | Pulmonary heart disease and diseases of pulmonary circulation                             |
| I30-I52      | Other forms of heart disease (deprecated 2021)                                            |
| I30-I5A      | Other forms of heart disease                                                              |
| I60-I69      | Cerebrovascular diseases                                                                  |
| Z59          | Problems related to housing and economic circumstances                                    |
| 9083         | BMI                                                                                       |

25 - 30 kg/m<sup>2</sup>

≥ 30 kg/m<sup>2</sup>

---

**Supplemental Table 3.** Diagnostic, visit, and procedural codes utilized in the definition of outcomes.  
Index date: the first date of antiviral agent prescription for the study group, the first date of diagnosis for control group

Outcome time window: 3 days to 1 month after the index date

| Category                                                                | Code                         | Description                |
|-------------------------------------------------------------------------|------------------------------|----------------------------|
| <b>#1 Composite outcomes (must have #1.1 or #1.2 or #1.3 )</b>          |                              |                            |
| <b>#1.1: All-cause ED visit (must have any of the following)</b>        |                              |                            |
| visit                                                                   | UMLS:HL7V3.0:VisitType:EMER  | Visit: Emergency           |
| <b>#1.2: All-cause hospitalization (must have any of the following)</b> |                              |                            |
| visit                                                                   | UMLS:HL7V3.0:VisitType:ACUTE | Visit: Inpatient Acute     |
| visit                                                                   | UMLS:HL7V3.0:VisitType:IMP   | Visit: Inpatient Encounter |
| visit                                                                   | UMLS:HL7V3.0:VisitType:NONAC | Visit: Inpatient Non-acute |
| visit                                                                   | UMLS:HL7V3.0:VisitType:SS    | Visit: Short Stay          |
| <b>#1.3 All-cause mortality (must have the following)</b>               |                              |                            |
| Demographics                                                            | Deceased                     | Deceased                   |

**Supplemental Table 4.** Demographic, diagnostic, procedural, and medication codes utilized in the definition of the subgroup analysis

|                                                                                                     |                       |                                                               |
|-----------------------------------------------------------------------------------------------------|-----------------------|---------------------------------------------------------------|
| <b>#1 Age</b>                                                                                       |                       |                                                               |
| <b>#1.1 Age &lt;65</b>                                                                              |                       |                                                               |
| demographics                                                                                        | Age                   | between 18 and 64 years                                       |
| <b>#1.2 Age ≥ 65</b>                                                                                |                       |                                                               |
| demographics                                                                                        | Age                   | ≥ 65 years                                                    |
| <b>#2 Sex</b>                                                                                       |                       |                                                               |
| <b>#2.1 Female</b>                                                                                  |                       |                                                               |
| demographics                                                                                        | UMLS:HL7V3.0:Gender:F | Female                                                        |
| <b>#2.2 Male</b>                                                                                    |                       |                                                               |
| demographics                                                                                        | UMLS:HL7V3.0:Gender:M | Male                                                          |
| <b>#3 Comorbid conditions</b> (conditions occurred within 1 year and 1 month before the index date) |                       |                                                               |
| <b>#3.1: Cardiovascular diseases</b>                                                                |                       |                                                               |
| diagnosis                                                                                           | UMLS:ICD10CM:I10-I15  | Hypertensive diseases (deprecated 2018)                       |
| diagnosis                                                                                           | UMLS:ICD10CM:I10-I1A  | Hypertensive diseases                                         |
| diagnosis                                                                                           | UMLS:ICD10CM:I20-I25  | Ischemic heart diseases                                       |
| diagnosis                                                                                           | UMLS:ICD10CM:I26-I28  | Pulmonary heart disease and diseases of pulmonary circulation |
| diagnosis                                                                                           | UMLS:ICD10CM:I30-I52  | Other forms of heart disease (deprecated 2021)                |
| diagnosis                                                                                           | UMLS:ICD10CM:I30-I5A  | Other forms of heart disease                                  |
| <b>#3.2: Cerebrovascular diseases</b>                                                               |                       |                                                               |
| diagnosis                                                                                           | UMLS:ICD10CM:I60-I69  | Cerebrovascular diseases                                      |
| <b>#3.3: Chronic liver diseases</b>                                                                 |                       |                                                               |
| diagnosis                                                                                           | UMLS:ICD10CM:K72.9    | Hepatic failure, unspecified                                  |
| diagnosis                                                                                           | UMLS:ICD10CM:K72.1    | Chronic hepatic failure                                       |
| diagnosis                                                                                           | UMLS:ICD10CM:K71.9    | Toxic liver disease, unspecified                              |
| diagnosis                                                                                           | UMLS:ICD10CM:K71.8    | Toxic liver disease with other disorders of liver             |
| diagnosis                                                                                           | UMLS:ICD10CM:K71.6    | Toxic liver disease with hepatitis, not elsewhere classified  |
| diagnosis                                                                                           | UMLS:ICD10CM:K71.5    | Toxic liver disease with chronic active hepatitis             |
| diagnosis                                                                                           | UMLS:ICD10CM:K71.4    | Toxic liver disease with chronic lobular hepatitis            |
| diagnosis                                                                                           | UMLS:ICD10CM:K71.3    | Toxic liver disease with chronic persistent hepatitis         |
| diagnosis                                                                                           | UMLS:ICD10CM:K71.1    | Toxic liver disease with hepatic necrosis                     |
| diagnosis                                                                                           | UMLS:ICD10CM:K71.0    | Toxic liver disease with cholestasis                          |
| diagnosis                                                                                           | UMLS:ICD10CM:K77      | Liver disorders in diseases classified elsewhere              |
| diagnosis                                                                                           | UMLS:ICD10CM:K75      | Other inflammatory liver diseases                             |
| diagnosis                                                                                           | UMLS:ICD10CM:K74      | Fibrosis and cirrhosis of liver                               |
| diagnosis                                                                                           | UMLS:ICD10CM:K73      | Chronic hepatitis, not elsewhere classified                   |
| diagnosis                                                                                           | UMLS:ICD10CM:K70      | Alcoholic liver disease                                       |
| diagnosis                                                                                           | UMLS:ICD10CM:K71.7    | Toxic liver disease with fibrosis and cirrhosis of liver      |
| <b>#3.4: Chronic lower lung diseases</b>                                                            |                       |                                                               |



|           |                      |                                    |
|-----------|----------------------|------------------------------------|
| diagnosis | UMLS:ICD10CM:J40-J47 | Chronic lower respiratory diseases |
|-----------|----------------------|------------------------------------|

### **#3.5: Chronic kidney diseases**

|           |                  |                              |
|-----------|------------------|------------------------------|
| diagnosis | UMLS:ICD10CM:N18 | Chronic kidney disease (CKD) |
|-----------|------------------|------------------------------|

### **#3.6: Type 2 diabetes mellitus**

|           |                  |                          |
|-----------|------------------|--------------------------|
| diagnosis | UMLS:ICD10CM:E11 | Type 2 diabetes mellitus |
|-----------|------------------|--------------------------|

### **#3.7: Overweight and obesity**

|            |                      |                                                 |
|------------|----------------------|-------------------------------------------------|
| diagnosis  | UMLS:ICD10CM:E65-E68 | Overweight, obesity and other hyperalimentation |
| laboratory | 9083                 | BMI ≥ 25 kg/m2                                  |

## **#4 SARS-CoV-2 infection status**

### **#4.1 Primary infection** (must not have the following 3 months prior to the index date)

|            |                     |                                                                                                                    |
|------------|---------------------|--------------------------------------------------------------------------------------------------------------------|
| laboratory | TNX:9088            | SARS coronavirus 2 and related RNA [Presence] (labResult: Positive)                                                |
| diagnosis  | UMLS:ICD10CM:U07.1  | COVID-19                                                                                                           |
| diagnosis  | UMLS:ICD10CM:U07.2  | COVID-19, virus not identified (WHO)                                                                               |
| diagnosis  | UMLS:ICD10CM:J12.81 | Pneumonia due to SARS-associated coronavirus                                                                       |
| diagnosis  | UMLS:ICD10CM:J12.82 | Pneumonia due to coronavirus disease 2019                                                                          |
| diagnosis  | UMLS:ICD10CM:B34.2  | Coronavirus infection, unspecified                                                                                 |
| diagnosis  | UMLS:ICD10CM:B97.2  | Coronavirus as the cause of diseases classified elsewhere                                                          |
| diagnosis  | UMLS:ICD10CM:B97.21 | SARS-associated coronavirus as the cause of diseases classified elsewhere                                          |
| diagnosis  | UMLS:ICD10CM:B97.29 | Other coronavirus as the cause of diseases classified elsewhere                                                    |
| laboratory | UMLS:LNC:94309-2    | SARS-CoV-2 (COVID-19) RNA [Presence] in Specimen by NAA with probe detection (labResult: Positive)                 |
| laboratory | UMLS:LNC:94500-6    | SARS-CoV-2 (COVID-19) RNA [Presence] in Respiratory specimen by NAA with probe detection (labResult: Positive)     |
| laboratory | UMLS:LNC:94502-2    | SARS-related coronavirus RNA [Presence] in Respiratory specimen by NAA with probe detection (labResult: Positive)  |
| laboratory | UMLS:LNC:94558-4    | SARS-CoV-2 (COVID-19) Ag [Presence] in Respiratory specimen by Rapid immunoassay (labResult: Positive)             |
| laboratory | UMLS:LNC:94565-9    | SARS-CoV-2 (COVID-19) RNA [Presence] in Nasopharynx by NAA with non-probe detection (labResult: Positive)          |
| laboratory | UMLS:LNC:94759-8    | SARS-CoV-2 (COVID-19) RNA [Presence] in Nasopharynx by NAA with probe detection (labResult: Positive)              |
| laboratory | UMLS:LNC:94845-5    | SARS-CoV-2 (COVID-19) RNA [Presence] in Saliva (oral fluid) by NAA with probe detection (labResult: Positive)      |
| laboratory | UMLS:LNC:95406-5    | SARS-CoV-2 (COVID-19) RNA [Presence] in Nose by NAA with probe detection (labResult: Positive)                     |
| laboratory | UMLS:LNC:95608-6    | SARS-CoV-2 (COVID-19) RNA [Presence] in Respiratory specimen by NAA with non-probe detection (labResult: Positive) |

|            |                  |                                                                                                        |
|------------|------------------|--------------------------------------------------------------------------------------------------------|
| laboratory | UMLS:LNC:96119-3 | SARS-CoV-2 (COVID-19) Ag [Presence] in Upper respiratory specimen by Immunoassay (labResult: Positive) |
|------------|------------------|--------------------------------------------------------------------------------------------------------|

**#4.2 Reinfection** (must have any of #4.1 3 months prior to the index date)

**#5 Outpatient COVID-19 antiviral treatment**

**#5.1 Treatment with NMV-r** (must have the following within 5 days of diagnosis)

|            |                    |              |
|------------|--------------------|--------------|
| medication | NLM:RXNORM:2587892 | nirmatrelvir |
| medication | NLM:RXNORM:85762   | ritonavir    |

**#5.2 Treatment with Molnupiravir**

|            |                    |              |
|------------|--------------------|--------------|
| medication | NLM:RXNORM:2587901 | molnupiravir |
|------------|--------------------|--------------|

**#6 COVID-19 booster vaccination status (excluded those who received booster vaccines within 2 weeks prior to the index date)**

**#5.1 No** (must not have any of following within 6 months prior to the index date)

|           |                |                                                                                                                                                                                                                                                                        |
|-----------|----------------|------------------------------------------------------------------------------------------------------------------------------------------------------------------------------------------------------------------------------------------------------------------------|
| procedure | UMLS:CPT:91300 | Severe acute respiratory syndrome coronavirus 2 (SARS-CoV-2) (coronavirus disease [COVID-19]) vaccine, mRNA-LNP, spike protein, preservative free, 30 mcg/0.3 mL dosage, diluent reconstituted, for intramuscular use                                                  |
| procedure | UMLS:CPT:91301 | Severe acute respiratory syndrome coronavirus 2 (SARS-CoV-2) (coronavirus disease [COVID-19]) vaccine, mRNA-LNP, spike protein, preservative free, 100 mcg/0.5 mL dosage, for intramuscular use                                                                        |
| procedure | UMLS:CPT:91302 | Severe acute respiratory syndrome coronavirus 2 (SARS-CoV-2) (coronavirus disease [COVID-19]) vaccine, DNA, spike protein, chimpanzee adenovirus Oxford 1 (ChAdOx1) vector, preservative free, 5x10 <sup>10</sup> viral particles/0.5 mL dosage, for intramuscular use |
| procedure | UMLS:CPT:91303 | Severe acute respiratory syndrome coronavirus 2 (SARS-CoV-2) (coronavirus disease [COVID-19]) vaccine, DNA, spike protein, adenovirus type 26 (Ad26) vector, preservative free, 5x10 <sup>10</sup> viral particles/0.5 mL dosage, for intramuscular use                |
| procedure | UMLS:CPT:91304 | Severe acute respiratory syndrome coronavirus 2 (SARS-CoV-2) (coronavirus disease [COVID-19]) vaccine, recombinant spike protein nanoparticle, saponin-based adjuvant, preservative free, 5 mcg/0.5 mL dosage, for intramuscular use                                   |
| procedure | UMLS:CPT:91305 | Severe acute respiratory syndrome coronavirus 2 (SARS-CoV-2) (coronavirus disease [COVID-19]) vaccine, mRNA-LNP, spike protein, preservative free, 30 mcg/0.3 mL dosage, tris-sucrose formulation, for intramuscular use                                               |
| procedure | UMLS:CPT:91306 | Severe acute respiratory syndrome coronavirus 2 (SARS-CoV-2) (coronavirus disease [COVID-19]) vaccine, mRNA-LNP, spike protein, preservative free, 50 mcg/0.25 mL dosage, for intramuscular use                                                                        |
| procedure | UMLS:CPT:91307 | Severe acute respiratory syndrome coronavirus 2 (SARS-CoV-2) (coronavirus disease [COVID-19]) vaccine, mRNA-LNP, spike protein, preservative free, 10 mcg/0.2 mL dosage, diluent reconstituted, tris-sucrose formulation, for intramuscular use                        |

|           |                |                                                                                                                                                                                                                                                          |
|-----------|----------------|----------------------------------------------------------------------------------------------------------------------------------------------------------------------------------------------------------------------------------------------------------|
| procedure | UMLS:CPT:91308 | Severe acute respiratory syndrome coronavirus 2 (SARS-CoV-2) (coronavirus disease [COVID-19]) vaccine, mRNA-LNP, spike protein, preservative free, 3 mcg/0.2 mL dosage, diluent reconstituted, tris-sucrose formulation, for intramuscular use           |
| procedure | UMLS:CPT:91309 | Severe acute respiratory syndrome coronavirus 2 (SARS-CoV-2) (coronavirus disease [COVID-19]) vaccine, mRNA-LNP, spike protein, preservative free, 50 mcg/0.5 mL dosage, for intramuscular use                                                           |
| procedure | UMLS:CPT:91311 | Severe acute respiratory syndrome coronavirus 2 (SARS-CoV-2) (coronavirus disease [COVID-19]) vaccine, mRNA-LNP, spike protein, preservative free, 25 mcg/0.25 mL dosage, for intramuscular use                                                          |
| procedure | UMLS:CPT:91312 | Severe acute respiratory syndrome coronavirus 2 (SARS-CoV-2) (coronavirus disease [COVID-19]) vaccine, mRNA-LNP, bivalent spike protein, preservative free, 30 mcg/0.3 mL dosage, tris-sucrose formulation, for intramuscular use                        |
| procedure | UMLS:CPT:91313 | Severe acute respiratory syndrome coronavirus 2 (SARS-CoV-2) (coronavirus disease [COVID-19]) vaccine, mRNA-LNP, spike protein, bivalent, preservative free, 50 mcg/0.5 mL dosage, for intramuscular use                                                 |
| procedure | UMLS:CPT:91314 | Severe acute respiratory syndrome coronavirus 2 (SARS-CoV-2) (coronavirus disease [COVID-19]) vaccine, mRNA-LNP, spike protein, bivalent, preservative free, 25 mcg/0.25 mL dosage, for intramuscular use                                                |
| procedure | UMLS:CPT:91315 | Severe acute respiratory syndrome coronavirus 2 (SARS-CoV-2) (coronavirus disease [COVID-19]) vaccine, mRNA-LNP, bivalent spike protein, preservative free, 10 mcg/0.2 mL dosage, diluent reconstituted, tris-sucrose formulation, for intramuscular use |
| procedure | UMLS:CPT:91316 | Severe acute respiratory syndrome coronavirus 2 (SARS-CoV-2) (coronavirus disease [COVID-19]) vaccine, mRNA-LNP, spike protein, bivalent, preservative free, 10 mcg/0.2 mL dosage, for intramuscular use                                                 |
| procedure | UMLS:CPT:91317 | Severe acute respiratory syndrome coronavirus 2 (SARS-CoV-2) (coronavirus disease [COVID-19]) vaccine, mRNA-LNP, bivalent spike protein, preservative free, 3 mcg/0.2 mL dosage, diluent reconstituted, tris-sucrose formulation, for intramuscular use  |
| procedure | UMLS:CPT:91318 | Severe acute respiratory syndrome coronavirus 2 (SARS-CoV-2) (coronavirus disease [COVID-19]) vaccine, mRNA-LNP, spike protein, 3 mcg/0.2 mL dosage, diluent reconstituted, tris-sucrose formulation, for intramuscular use                              |
| procedure | UMLS:CPT:91319 | Severe acute respiratory syndrome coronavirus 2 (SARS-CoV-2) (coronavirus disease [COVID-19]) vaccine, mRNA-LNP, spike protein, 10 mcg/0.2 mL dosage, tris-sucrose formulation, for intramuscular use                                                    |

|           |                |                                                                                                                                                                                                       |
|-----------|----------------|-------------------------------------------------------------------------------------------------------------------------------------------------------------------------------------------------------|
| procedure | UMLS:CPT:91320 | Severe acute respiratory syndrome coronavirus 2 (SARS-CoV-2) (coronavirus disease [COVID-19]) vaccine, mRNA-LNP, spike protein, 30 mcg/0.3 mL dosage, tris-sucrose formulation, for intramuscular use |
| procedure | UMLS:CPT:91321 | Severe acute respiratory syndrome coronavirus 2 (SARS-CoV-2) (coronavirus disease [COVID-19]) vaccine, mRNA-LNP, 25 mcg/0.25 mL dosage, for intramuscular use                                         |
| procedure | UMLS:CPT:91322 | Severe acute respiratory syndrome coronavirus 2 (SARS-CoV-2) (coronavirus disease [COVID-19]) vaccine, mRNA-LNP, 50 mcg/0.5 mL dosage, for intramuscular use                                          |

**#5.2 Yes** (must have any of #5.1 within 6 months prior to the index date)

---

**Supplemental Table 5.** Sensitivity analysis of the impact of early mortality exclusion on outcome comparisons

| Sensitivity analysis                             | No. (%) of patients with outcome |                          | HR (95% CI)        | Log-rank test <i>p</i> -value |
|--------------------------------------------------|----------------------------------|--------------------------|--------------------|-------------------------------|
|                                                  | Study group (n=17,516)           | Control group (n=17,516) |                    |                               |
| Primary outcome                                  |                                  |                          |                    |                               |
| All-cause ED visit, hospitalization or mortality | 1,213 (6.9)                      | 1,546 (8.8)              | 0.76 (0.71, 0.82)  | <0.0001                       |
| Secondary outcomes                               |                                  |                          |                    |                               |
| All-cause ED visit                               | 742 (4.2)                        | 901 (5.1)                | 0.81 (0.73,0.89)   | <0.0001                       |
| All-cause hospitalization                        | 582 (3.3)                        | 759 (4.3)                | 0.75 (0.67,0.84)   | <0.0001                       |
| All-cause mortality                              | 12 (0.1)                         | 43 (0.2)                 | 0.27 (0.144,0.519) | < 0.0001                      |
